# Supplementary material
Source: PubMed Central journal article supplement (PMC2626620)

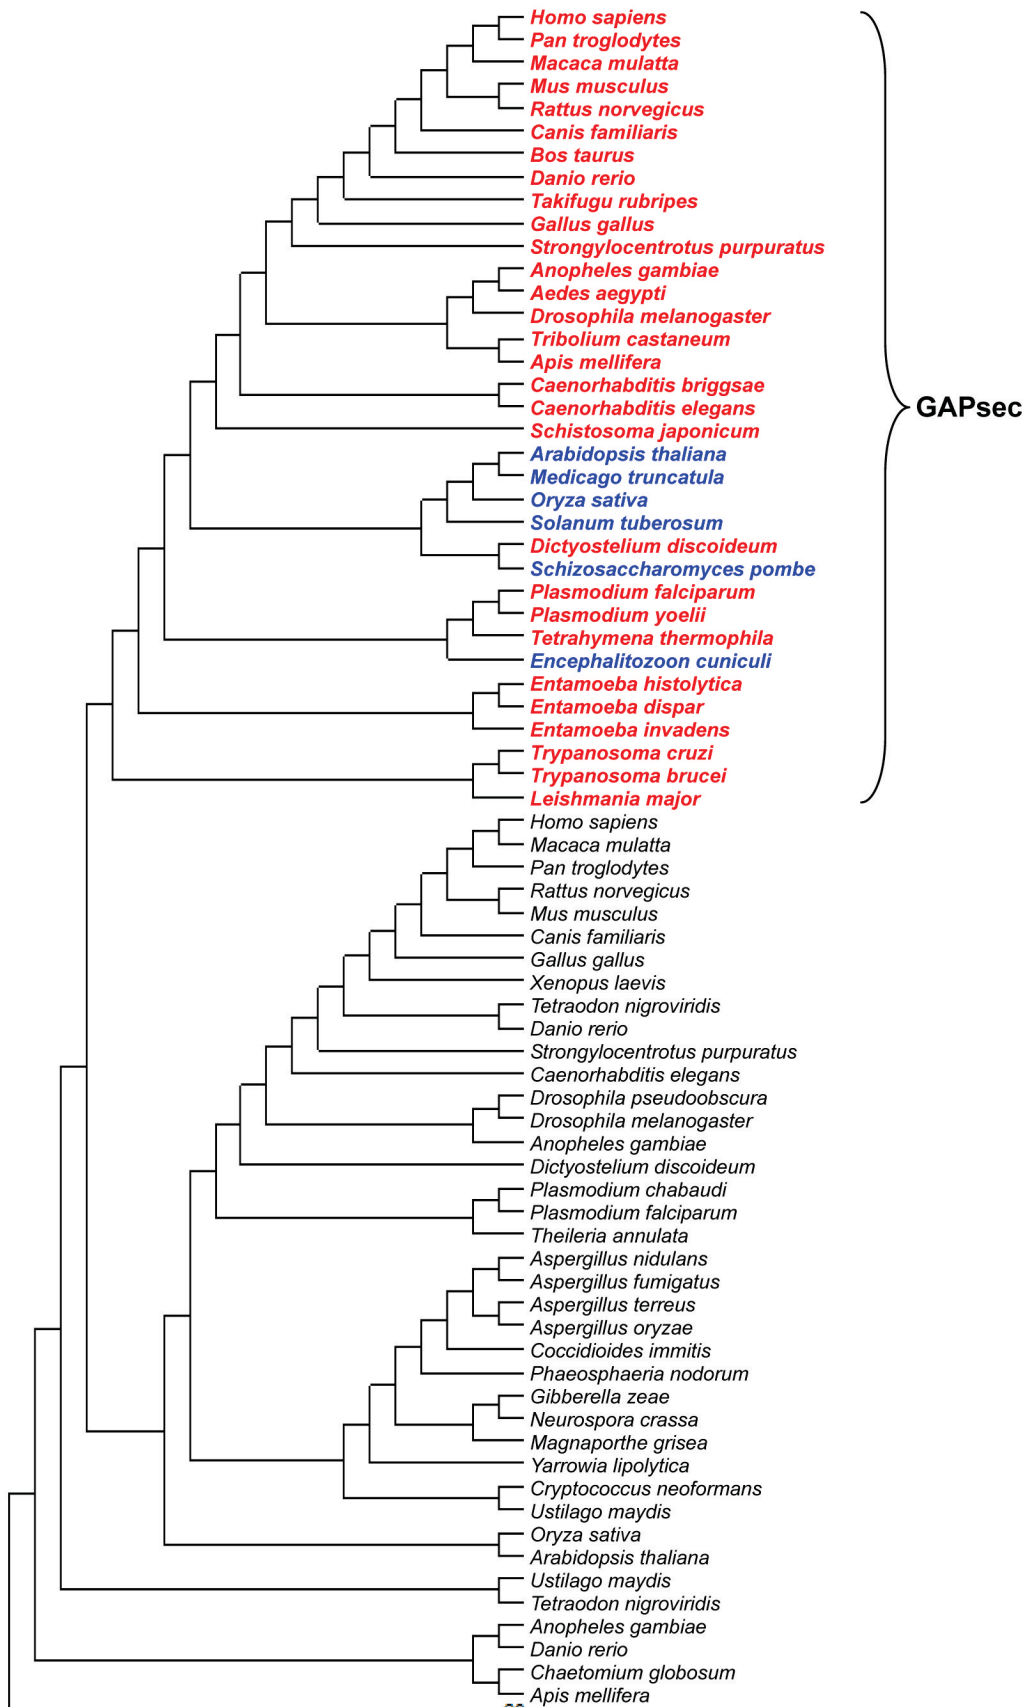

Supplement: fj.08-116640_1.pdf [file fj.08-116640_1.pdf]
